# Supplementary material for: Gut microbial co-abundance networks show specificity in inflammatory bowel disease and obesity
Source: PubMed Central journal article supplement (PMC7419557; doi:10.1038/s41467-020-17840-y), 2020-08-11
Supplement: 41467_2020_17840_MOESM2_ESM.pdf [file 41467_2020_17840_MOESM2_ESM.pdf]

Reviewers' comments:

Reviewer #1 (Remarks to the Author):

Review of Chen et al., 'Gut microbial co-abundance networks identify functional hubs in inflammatory bowel disease and obesity'

This study by Chen et al. applies a correlation-based analysis to identify key organizational differences between the microbiome of four different cohorts: two population cohorts, an obese cohort, and an IBD cohort. A fundamental problem in defining microbiome 'state' is that most studies focus on a parts-list description of the microbiome: an enumeration of what is present and at what fraction the parts are present. This type of description misses critical information regarding microbiome structure, i.e. the interactions between members of the microbiota or functional repertoires of the microbiome. Chen et al. do a good job of identifying this problem and posing that considering interactions between microbial members or genetic elements of the microbiome is a worthwhile endeavor and one that should be considered.

As is said several times in the manuscript, the study conducted by Chen et al. is the 'largest metagenomics-based network analysis to date' and is therefore noble in cause. However, there are several issues that need to be addressed in order for the major conclusions presented (that there is a difference in network architecture between IBD, obesity, and 'normal') to be adopted by readers. This review will first address broad issues, then address specific ones that were evident while reading the manuscript.

General comments

The number of pathways (using the HUMAN2 pipeline) that satisfied the authors' threshold was on the order of 300. The number of possible pairwise interactions is therefore 3002 or  $\sim 10^3$ . Thus, to achieve adequate sampling for detecting statistically significant correlations, one needs at least 100 to 1000-fold the complexity of interactions, meaning that the number of people sampled would need to be on the order of 10<sup>7</sup>-10<sup>8</sup>, a far cry from the  $\sim 2500$  people sampled in this study. Of paramount importance when assigning correlations to an under-sampled study is to make sure that the correlations identified are not spurious.

While sampling 107 people is not going to be a possibility in the near future, there are ways that others in the field have gotten around this problem. Leveraging longitudinal data has provided ways to study the stability of correlation networks to identify what features of organization are conserved and what are idiosyncratic or spurious to particular timepoints. Additionally, there are many ways to measure network organization including SparCC (the method the authors used), SPIEC-EASI, Singular Value Decomposition, t-SNE. Using any one of these on their own (as is the case in this manuscript) is placing too much emphasis on the fidelity of a particular approach, all of which have their own caveats, rules, and underlying mathematics. The authors make the point that they chose SparCC because of the suggestion of Weiss et al ('Correlation detection strategies in microbial data sets vary widely in sensitivity and precision', ISME Journal (2016)). In the two years since that paper has been written, newer more sophisticated methods have been employed to understand the organization of complex systems within and outside the field of microbiome science. It would be worth the authors' time to look into other methods of judging whether there are truly differences between the microbiomes of the cohorts using these other methods (SVD, t-SNE, SPIEC-EASI) and not solely trusting SparCC (which, in the hands of this reviewer, has produced mixed results at best).

Relatedly, the authors absolutely must define a null-model for correlation if assigning p-values to the results they observe, particularly in the limit that they are drastically under-sampled with respect to cohort size. Random matrix theory (RMT) approaches have demonstrated that non-random correlation structure can exist in finitely sampled datasets even when the matrix is comprised of shuffled data that maintains the underlying probability distributions. This is a substantial problem given the under-sampling evident in this study. A way to address this would be to answer the question, what would be a random model of correlation given  $\sim 2500$  samples with  $\sim 300$  pathways within this study? The lack of such a model creates unphysical (and

unbelievable) p-value results such as  $P < 10^{-260}$ —a result that suggests either that a physical law (i.e. gravitation, laws of thermodynamics, Maxwell's equations, etc) has been identified from the data or, more likely, that the framework of the null hypothesis is invalid.

Given the limits in determining the validity of correlations in the paper, it is difficult to place faith in the interpretation of the results. It would be far more powerful to either (1) do an experiment to validate any of the findings, or (2) use other statistical methods that show a similar trend as those generated from the SparCC approach.

#### Specific comments

-Title: 'Functional Hubs' is an inaccurate wording. There is no evidence to suggest that the hubs themselves are 'functional'; merely that they differentiate between the statistically defined configurations of IBD and obesity

-Abstract: 'that might represent potential therapeutic targets for disease prevention and treatment'. This line is overused in microbiome science. In a paper where there are no experiments that reconfigure the microbiome or measure any effect on host physiology, it is a substantial stretch to say that any differentiating feature identified is not simply an epiphenomenon of a more fundamental underlying process underscoring important dynamical processes that have gone awry (i.e. host genetics and transcriptional patterns). Such statements need to be toned down across the field, and there is an opportunity to do this here.

-Introduction, line 65: Please avoid using words like 'strong'. This is a subjective criteria and, in the opinion of this reviewer, untrue. There is sparse evidence, at best, to suggest that the microbiome composition is related to development of diseases.

-Introduction, transition from Paragraph 1 to paragraph 2. The authors make a point of saying that interactions between ecological components are important to identify at the end of paragraph 1. Then in the beginning of paragraph 2 state that network inference tools have been developed. Why are statistical inferences valid substitutions for ecological interactions? There is a logical leap from needing to identify interactions to using statistics as a proxy for interactions. This needs to be explicated more.

-Results. SparCC is predicated on the log-transformation of variance. In this reviewer's experience, SparCC provides different results than SPIEC-EASI and Singular Value Decomposition. As stated above, if the authors performed other statistical techniques that are supposed to identify key 'features' in a complex system, how do the results compare to their current results?

-Results: Line 138. What are 'consistent' effects? A further description of what this entails would be helpful to understand what seems to be a powerful control in looking at a separate cohort of IBD

-Results: Lines 154-155. It would be worthwhile to perform PCA on the pathways outlined here to see if they separate cohorts. They should if the statistical significance holds true.

-Results: Lines 168-169. P values of  $< 10^{-64}$  and  $10^{-260}$  do not make sense. Please either reevaluate the null hypothesis or explain how these p-values are generated.

-Results: Line 170. There are 'xxx' and 'xx' words in the sentence. These need to be specified as these numbers are crucial to the results.

-Results: the use of HUMAnN2. What would happen if another pathway annotation scheme were used, i.e. mcSEED?

-Results: Lines 196-207. The functional link to physiology is specious. The co-abundant pathways are identified through statistical analysis of fecal samples; why should there be a correspondence

between what is observed in the feces with core metabolism in the organism?

-Methods: Line 571-572. It would be worth analyzing the longitudinal data of the iHMP to see what the stability of the co-abundant network is over time and through fluctuations in disease and recovery. IBD is a particularly salient use-case for looking at dynamics of the microbiome as patients go through phases of disease that vary in severity; thus each person can serve as their own 'control' so to speak.

Reviewer #2 (Remarks to the Author):

The manuscript by Chen et al., describes a large co-abundance network-based microbiota analysis in 4 different cohorts. Sample material was stool, which was handled identically between the cohorts and metagenomic sequences were obtained in a single centre. The co-abundance networks were reconstructed from species- and pathway-level information. The study claims that specific microbial co-abundance relationships are associated with the physiological (or pathological) state, however they also show a high degree of heterogeneity (64% at the pathway level). For the IBD cohort, effects were partially verified in an independent iHMP cohort. Cohort-specific edges were significantly enriched in the IBD and obesity cohorts and are described to be enriched in few hubs (obesity 1 pathway hub, IBD 5 species and 6 pathway hubs). The obesity hub is associated with allantoin degradation, the top pathway hubs for IBD was assigned to the reductive TCA cycle term.

The study is a large descriptive undertaking and makes use of existing metagenomic datasets from large cohorts. The employed algorithms and statistical approaches seem appropriate, however the manuscript lacks in my eyes the necessary clarity and scrutiny on physiological relevance of the findings.

The manuscript is written in a very technical style, rarely the approaches are bio-medically "translated". For a broader readership, I would strongly recommend re-writing the abstract, results (and discussion) section. The network lingo is not very instructive, I would also suggest to move the analytical scheme in abbreviated form into the main figures, so that one can follow the flow of analyses.

The entire study is based on features that are present in >20% in at least one of the cohorts. How did the authors define this number, what would happen if the cutoff is set to 5, 10 or 30 % ? Although the network analyses and figures are highly sophisticated, the clinical variables are only treated very superficially. There are networks specific to the "obesity" cohort, but clinically the BMI range is huge. Maybe I misunderstood, but have the authors tried to quantitatively model the co-abundance network with the BMI? If something is appearing in a cohort which samples high BMI individuals, shouldn't the same network properties also occur, if high BMI individuals are subsampled from the other cohorts ?

Also, the clinical attribute IBD is inappropriate if only used alone. The authors clearly must try to discriminate between CD/UC and to correlate their findings to clinical activity and co-medication. The stability assessment (p8, line 170ff.) refers to this to some degree, but is really unclear and vague.

Some strange technical typos: p8, line 170 "xxx species and xx pathway edges" ?, the references have strange page numbers (partially)

1 **Reviewer 1:**

2 This study by Chen et al. applies a correlation-based analysis to identify key  
3 organizational differences between the microbiome of four different cohorts: two  
4 population cohorts, an obese cohort, and an IBD cohort. A fundamental problem in  
5 defining microbiome 'state' is that most studies focus on a parts-list description of the  
6 microbiome: an enumeration of what is present and at what fraction the parts are  
7 present. This type of description misses critical information regarding microbiome  
8 structure, i.e. the interactions between members of the microbiota or functional  
9 repertoires of the microbiome. Chen et al. do a good job of identifying this problem and  
10 posing that considering interactions between microbial members or genetic elements of  
11 the microbiome is a worthwhile endeavor and one that should be considered.

12 As is said several times in the manuscript, the study conducted by Chen et al. is the  
13 'largest metagenomics-based network analysis to date' and is therefore noble in cause.  
14 However, there are several issues that need to be addressed in order for the major  
15 conclusions presented (that there is a difference in network architecture between IBD,  
16 obesity, and 'normal') to be adopted by readers. This review will first address broad  
17 issues, then address specific ones that were evident while reading the manuscript.

18

19 **Reply:** We thank the reviewer for their positive comments on the advances made in this  
20 study. We have significantly revised the manuscript and added two separate result  
21 sections "**Microbial co-abundance network in IBD**" (Line 151-232) and "**Microbial**  
22 **co-abundance network in 3000B**" (Line 233-261). We believe that the results  
23 regarding the difference in network architecture in IBD and obesity are now better  
24 presented. We address the concerns raised by the reviewer in detail below.

25

26 **General comments**

27 The number of pathways (using the HUMAnN2 pipeline) that satisfied the authors'  
28 threshold was on the order of 300. The number of possible pairwise interactions is  
29 therefore  $300^2$  or  $\sim 10^5$ . Thus, to achieve adequate sampling for detecting statistically  
30 significant correlations, one needs at least 100 to 1000-fold the complexity of  
31 interactions, meaning that the number of people sampled would need to be on the order  
32 of  $10^7$ - $10^8$ , a far cry from the  $\sim 2500$  people sampled in this study. Of paramount  
33 importance when assigning correlations to an under-sampled study is to make sure that  
34 the correlations identified are not spurious.

35 While sampling  $10^7$  people is not going to be a possibility in the near future, there are  
36 ways that others in the field have gotten around this problem. Leveraging longitudinal

37 data has provided ways to study the stability of correlation networks to identify what  
38 features of organization are conserved and what are idiosyncratic or spurious to  
39 particular time points.

40 Additionally, there are many ways to measure network organization including SparCC  
41 (the method the authors used), SPIEC-EASI, Singular Value Decomposition, t-SNE. Using  
42 any one of these on their own (as is the case in this manuscript) is placing too much  
43 emphasis on the fidelity of a particular approach, all of which have their own caveats,  
44 rules, and underlying mathematics. The authors make the point that they chose SparCC  
45 because of the suggestion of Weiss et al ('Correlation detection strategies in microbial  
46 data sets vary widely in sensitivity and precision', ISME Journal (2016)). In the two  
47 years since that paper has been written, newer more sophisticated methods have been  
48 employed to understand the organization of complex systems within and outside the  
49 field of microbiome science. It would be worth the authors' time to look into other  
50 methods of judging whether there are truly differences between the microbiomes of the  
51 cohorts using these other methods (SVD, t-SNE, SPIEC-EASI) and not solely trusting  
52 SparCC (which, in the hands of this reviewer, has produced mixed results at best).

53 Relatedly, the authors absolutely must define a null-model for correlation if assigning p-  
54 values to the results they observe, particularly in the limit that they are drastically  
55 under-sampled with respect to cohort size. Random matrix theory (RMT) approaches  
56 have demonstrated that non-random correlation structure can exist in finitely sampled  
57 datasets even when the matrix is comprised of shuffled data that maintains the  
58 underlying probability distributions. This is a substantial problem given the under-  
59 sampling evident in this study. A way to address this would be to answer the question,  
60 what would be a random model of correlation given ~2500 samples with ~300  
61 pathways within this study? The lack of such a model creates unphysical (and  
62 unbelievable) p-value results such as  $P < 10^{-260}$ —a result that suggests either that a  
63 physical law (i.e. gravitation, laws of thermodynamics, Maxwell's equations, etc) has  
64 been identified from the data or, more likely, that the framework of the null hypothesis  
65 is invalid.

66 Given the limits in determining the validity of correlations in the paper, it is difficult to  
67 place faith in the interpretation of the results. It would be far more powerful to either  
68 (1) do an experiment to validate any of the findings, or (2) use other statistical methods  
69 that show a similar trend as those generated from the SparCC approach.

70

71

72 **Reply:** We thank the reviewer for pointing out several limitations of statistical inference  
73 of microbiome networks in both ours and other studies, particularly three important  
74 issues:

75

76 **1) Are the conclusions reproducible when applying another method?**

77 As suggested by the reviewer, we have now applied both SparCC and SPIEC-EASI for  
78 network construction. SPIEC-EASI infers a network via an inverse covariance matrix  
79 derived from compositional data after log-ratio transformation. SPIEC-EASI calculates  
80 correlation coefficients based on partial correlation-based methods. In principle, SPIEC-  
81 EASI can reduce indirect associations, but it can also make estimation of co-abundance  
82 strength difficult to compare across different cohorts. Figure 1 below compares  
83 correlation coefficients estimated by SparCC and SPIEC-EASI. Despite high correlation  
84 between the two methods ( $r > 0.81$ ,  $P < 2.2 \times 10^{-16}$ ), the partial correlation correlations  
85 estimated by SPIEC-EASI are indeed smaller than those estimated by SparCC. Of the  
86 5,863 species and 56,519 pathway edges established by SparCC at  $FDR < 0.05$  level, 3,454  
87 (58.91%) and 43,355 (76.71%) were detected by SPIEC-EASI (Table 1).

88

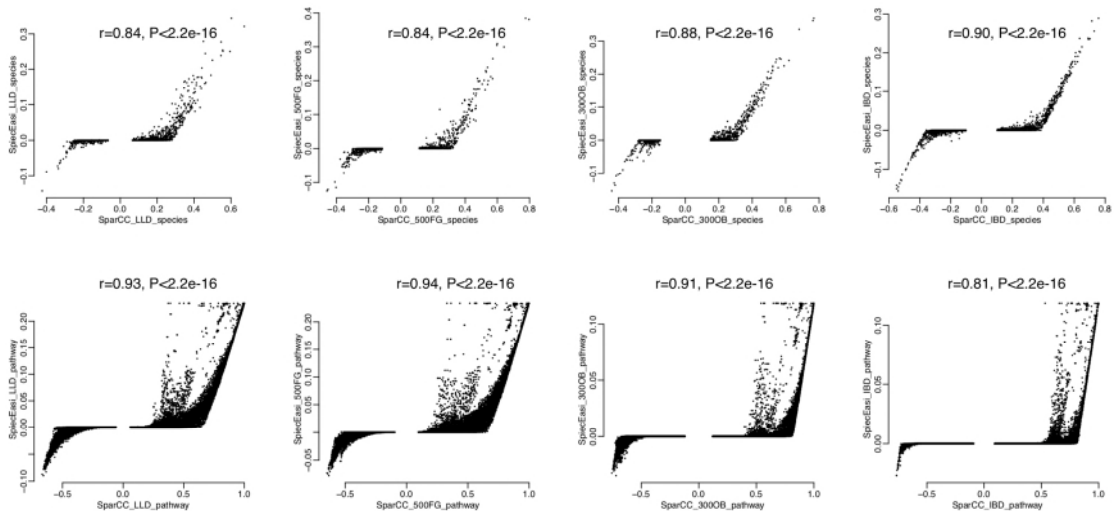

89

90 Rebuttal Figure1. Correlation of species and pathway co-abundance strengths generated  
91 by SparCC and SPIEC-EASI  
92

93 We therefore consider these two methods to be complimentary and combined these two  
94 methods in our revised study, i.e. we only consider microbial co-abundances that can be  
95 detected by SparCC at  $FDR < 0.05$  and by SPIEC-EASI (passed inverse covariance  
96 selection model).

97

Rebuttal Table 1. Overlapped co-abundances between SparCC and SpiecEasi

|                         |                    | LLD   | 500FG | 3000B | IBD   |
|-------------------------|--------------------|-------|-------|-------|-------|
| Species<br>co-abundance | SparCC only        | 3931  | 2109  | 1368  | 3907  |
|                         | SparCC + SpiecEasi | 2604  | 1591  | 1107  | 2554  |
| Pathway<br>co-abundance | SparCC only        | 50121 | 44664 | 46744 | 47566 |
|                         | SparCC + SpiecEasi | 40699 | 37279 | 37886 | 37699 |

99

100 We have updated the method and manuscript accordingly. Notably, the general  
 101 conclusion still holds. We found that 38.6% of species co-abundances and 64.3% of  
 102 pathway co-abundances showed variable correlation strengths among our four cohorts,  
 103 with 120 species and 1448 pathway edges showing cohort-specificity, mainly in IBD  
 104 (113 IBD-specific species co-abundances and 1050 IBD-specific pathway co-  
 105 abundances).

106 The Method section has been updated:

107 L445-448: *“To reduce indirect associations, we further applied SPIEC-EASI, which infers*  
 108 *the microbial network underlying graphical model using the concept of conditional*  
 109 *independence [38]. In this way, we obtained 3,454 species and 43,355 pathway co-*  
 110 *abundances that were detectable by both methods (Fig 1).”*

111

112 **2) Addressing the power issue and leveraging longitudinal data to provide ways to**  
 113 **study the stability of correlation networks and identify which features are**  
 114 **conserved and which are idiosyncratic or spurious to particular time points.**

115 We fully agree with the reviewer that the current study is still under-sampled for  
 116 comparing the number of interactions that we tested. We have discussed this limitation  
 117 in the Discussion.

118 Line 324-327: *“However, we also acknowledge several limitations of our study. This is an*  
 119 *in-silico network analysis based on correlation in bacterial abundance levels. Even with the*  
 120 *largest sample size to date, our study is still undersized for making comparisons to the*  
 121 *number of interactions assessed.”*

122

123 Following the reviewer’s valuable suggestion, we have now used longitudinal data of 77  
 124 IBD patients from the integrative Human Microbiome Project (iHMP-IBD) to assess the  
 125 stability of the correlation networks. Firstly, we replicated the IBD co-abundance  
 126 networks using metagenomics data of the first sample collection from 77 iHMP-IBD  
 127 participants. Out of the 2,090 and 37,106 IBD species and network co-abundances that  
 128 can be assessed in the iHMP-IBD cohort, 1,705 (81.6%) species co-abundances and

129 27,886 (65.1%) of pathway co-abundances showed no difference in terms of their co-  
130 abundance strength (Cochran-Q test  $P > 0.05$ ). Then, we compared the IBD co-abundance  
131 networks between the first and the last time points (~one year apart) in iHMP-IBD and  
132 observed 90.6% and 99.6% replication for species and pathway co-abundances,  
133 respectively (Cochran-Q test  $P > 0.05$ ). These results are now discussed in the main text  
134 and detailed results have been added to Tables S1 & S3.

135 L152-166: **“Replication of the IBD network in the iHMP-IBD cohort: Of the 2,554**  
136 *species and 37,699 pathway co-abundances established in our IBD cohort, we were able to*  
137 *assess 2,090 species co-abundances and 37,106 pathway co-abundances in 77 IBD*  
138 *individuals from the integrative Human Microbiome Project (iHMP-IBD) [39]. In the*  
139 *baseline samples of the iHMP-IBD cohort, 531 species co-abundances (25.4%) and 21,882*  
140 *(59.0%) pathway co-abundance could be replicated at  $P < 0.05$  (Tables S7-8) [39]. The*  
141 *relatively low replication rate in species co-abundances is largely a power issue, as we also*  
142 *observed that 1,705 (81.6%) species co-abundances and 24,165 (65.1%) pathway co-*  
143 *abundances showed no significant difference in their co-abundance strengths between our*  
144 *IBD cohort and the iHMP-IBD cohort (Cochran-Q test,  $P > 0.05$ , Fig S6, Tables S7-8). We then*  
145 *compared the IBD networks between the first and last time points of the iHMP-IBD cohort*  
146 *(~1 year apart) and replicated 90.6% of species co-abundances and 99.6% of pathway co-*  
147 *abundances (Cochran-Q test,  $P > 0.05$ , Fig S6, Tables S7-8). This suggests that our*  
148 *estimation of co-abundance strengths in IBD was largely replicable in a different cohort*  
149 *and was stable across time.”*

150 The comparison is now shown in Supplementary figure 6.

151

152 **Figure S6.** Replication of the IBD  
153 network using longitudinal data from  
154 the iHMP-IBD cohort. We assessed the  
155 replication rate of IBD co-abundances  
156 in the iHMP-IBD cohort, as well as their  
157 stability between the first and last time  
158 points. Both the X- and Y-axis  
159 represent the correlation coefficient of  
160 co-abundances. Each dot represents  
161 one co-abundance. Red dots represent  
162 microbial co-abundances that show a  
163 difference in their effect size between  
164 the first and last time points at  $P < 0.05$ .

165

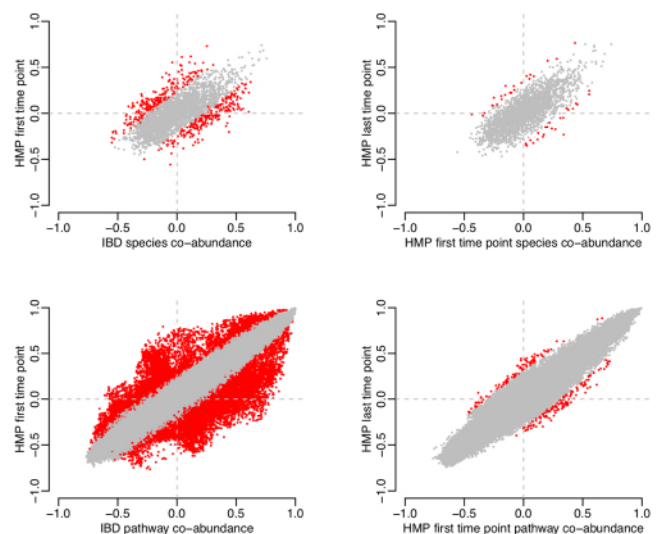



166 **3) P-value results such as  $P < 10^{-260}$  are unbelievable. The authors absolutely must**  
167 **define a null-model for correlation.**

168 We apologize for the confusion, the  $P < 10^{-260}$  was not for co-abundance but for the  
169 enrichment analysis of cohort-specific effects. We found a total of 1,448 cohort-specific  
170 pathway co-abundances, with 1,050 of them related to IBD, 281 to the obesity cohort  
171 and 117 to population-based cohort. Cohort enrichment was assessed using Fisher's  
172 exact test, and the P value was estimated to be  $P < 10^{-260}$ . To make it clearer in the revised  
173 manuscript, we have added Figure 3C & D (see below) to show the distribution of  
174 cohort-specific co-abundances in different cohorts.

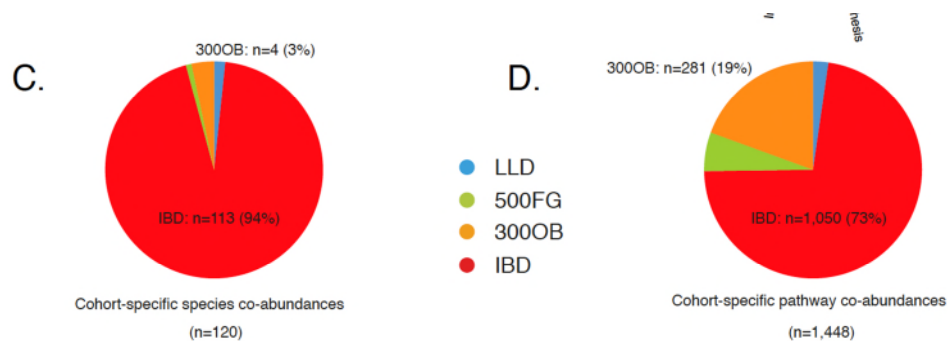

175

176 **Figure 3. C.** Pie chart of 120 cohort-specific species co-abundances showing the  
177 proportion of specific co-abundances detected in each cohort. **D.** Pie chart of 1,448  
178 cohort-specific pathway co-abundances showing the proportion of specific co-  
179 abundances detected in each cohort.

180

181 For null-model of correlation, we applied SparCC default settings, i.e. we calculate a P-  
182 value based on the distribution of correlation coefficients generated by using 100 times  
183 permutation. The distribution of null-model correlation coefficients is shown in Figure  
184 2, and the minimal P-value is close to 0.01 based on 100 times permutation. We further  
185 calculated study-wise FDRs based on the permutation results (script available via:  
186 [https://github.com/GRONINGEN-MICROBIOME-CENTRE/Groningen-](https://github.com/GRONINGEN-MICROBIOME-CENTRE/Groningen-Microbiome/tree/master/Projects/Microbial%20co-abundance%20network)  
187 [Microbiome/tree/master/Projects/Microbial%20co-abundance%20network](https://github.com/GRONINGEN-MICROBIOME-CENTRE/Groningen-Microbiome/tree/master/Projects/Microbial%20co-abundance%20network)).

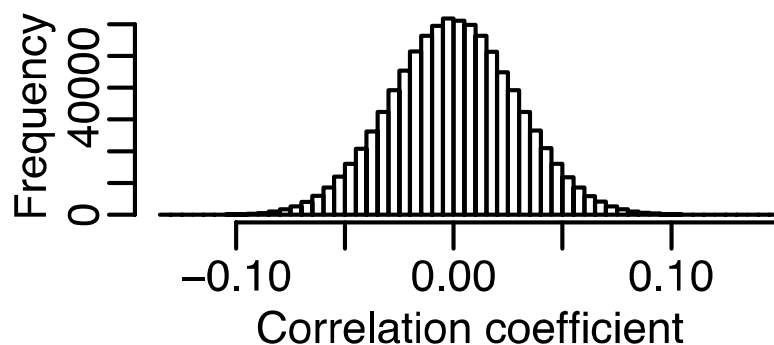

188

189 Rebuttal Figure 2. Distribution of null-model SparCC correlation coefficients generated  
190 by 100 times permutation

191 Specific comments

192 -Title: 'Functional Hubs' is an inaccurate wording. There is no evidence to suggest that  
193 the hubs themselves are 'functional'; merely that they differentiate between the  
194 statistically defined configurations of IBD and obesity

195

196 **Reply:** We agree with this reviewer, now have changed the title to: "*Gut Microbial Co-*  
197 *abundance Networks Show Specificity in Inflammatory Bowel Disease and Obesity*"

198

199 -Abstract: 'that might represent potential therapeutic targets for disease prevention and  
200 treatment'. This line is overused in microbiome science. In a paper where there are no  
201 experiments that reconfigure the microbiome or measure any effect on host physiology,  
202 it is a substantial stretch to say that any differentiating feature identified is not simply  
203 an epiphenomenon of a more fundamental underlying process underscoring important  
204 dynamical processes that have gone awry (i.e. host genetics and transcriptional  
205 patterns). Such statements need to be toned down across the field, and there is an  
206 opportunity to do this here.

207

208 **Reply:** We thank this reviewer for pointing out the over-interpretation of results, we  
209 have now changed the text to:

210 L49-52: "*Our study identifies several key species and pathways in IBD and obesity and*  
211 *provides evidence that altered microbial abundances in disease can reflect their co-*  
212 *abundance relationship, which expands our current knowledge regarding microbial*  
213 *dysbiosis in disease.*"

214

215 -Introduction, line 65: Please avoid using words like 'strong'. This is a subjective criteria  
216 and, in the opinion of this reviewer, untrue. There is sparse evidence, at best, to suggest  
217 that the microbiome composition is related to development of diseases.

218

219 **Reply:** We thank the reviewer for pointing this out, we have now changed it to:

220 L59-62: "*In recent years, associations have been identified between gut microbiome*  
221 *composition and the development of certain human diseases including diabetes <sup>6,7</sup>,*  
222 *cardiovascular disorders <sup>8,9</sup>, obesity <sup>10,11</sup> and chronic gastrointestinal disorders like*  
223 *inflammatory bowel disease (IBD) <sup>12-14</sup>*"

224

225 -Introduction, transition from Paragraph 1 to paragraph 2. The authors make a point of  
226 saying that interactions between ecological components are important to identify at the

227 end of paragraph 1. Then in the beginning of paragraph 2 state that network inference  
228 tools have been developed. Why are statistical inferences valid substitutions for  
229 ecological interactions? There is a logical leap from needing to identify interactions to  
230 using statistics as a proxy for interactions. This needs to be explicated more.

231

232 **Reply:** We thank the reviewer for pointing this out, we have now added:

233 L68-72: *“Enthusiasm has thus been rising to decipher these microbial interactions in order  
234 to detect key microbes in health and disease<sup>23,24</sup>. One way of doing this is to create co-  
235 abundance networks based on correlations, a method that has the potential to study  
236 interactions between microbes and thereby generate hypotheses for experimental  
237 validation at a later stage<sup>23,24</sup>”*

238

239 -Results. SparCC is predicated on the log-transformation of variance. In this reviewer’s  
240 experience, SparCC provides different results than SPIEC-EASI and Singular Value  
241 Decomposition. As stated above, if the authors performed other statistical techniques  
242 that are supposed to identify key ‘features’ in a complex system, how do the results  
243 compare to their current results?

244

245 **Reply:** We agree with the reviewer’s comment and have now applied both SparCC and  
246 SPIEC-EASI. For details please see the answer above.

247

248 -Results: Line 138. What are ‘consistent’ effects? A further description of what this  
249 entails would be helpful to understand what seems to be a powerful control in looking at  
250 a separate cohort of IBD

251

252 **Reply:** We have changed “consistent” to “comparable”, i.e. they do not show  
253 heterogeneity. Apart from the cross-sectional replication in the iHMP-IBD cohort, we  
254 have now also added longitudinal replication by using the first and last time point  
255 samples from 77 iHMP-IBD participants (~one year apart). Here we observed that,  
256 indeed, microbial network in IBD were stable. This result has now been added to the  
257 result section:

258 L162-166: *“We then compared the IBD networks between the first and last time points of  
259 the iHMP-IBD cohort (~1 year apart) and replicated 90.6% of species co-abundances and  
260 99.6% of pathway co-abundances (Cochran-Q test,  $P>0.05$ , Fig S6, Tables S7-8). This  
261 suggests that our estimation of co-abundance strengths in IBD was largely replicable in a  
262 different cohort and was stable across time.”*

263 -Results: Lines 154-155. It would be worthwhile to perform PCA on the pathways  
264 outlined here to see if they separate cohorts. They should if the statistical significance  
265 holds true.

266

267 **Reply:** We have now included the PCA plot of both microbial species and pathways. We  
268 found that the four cohorts were largely overlapped, we also observe significant  
269 differences in microbial species and pathway composition between cohorts (Wilcoxon  
270 test  $P < 0.05$ ).

271 This result has been added to the main text. Line 94-97: “Metagenomic data of the 2,379  
272 participants from the four cohorts was processed using the same pipeline. Principle  
273 coordinate analysis showed that microbial composition and functional profiles are largely  
274 overlapped, although we observed a significant shift in species composition in the IBD  
275 cohort (Fig S2).”

276

277 The PCoA plot has also been shown in the supplementary figure 2.

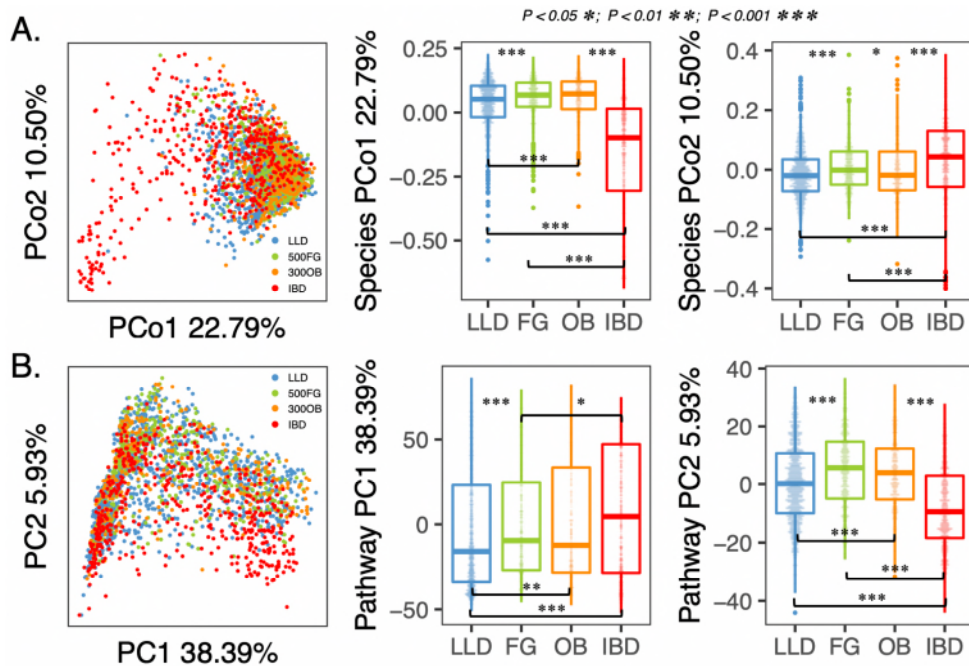

278

279 **Figure S2.** Principal component analysis of microbial species and pathways. A. PCoA  
280 (Bray-Curtis distance matrix) of 134 species that are present in >20% of samples in at  
281 least one cohort. B. PCA (Euclidean distance matrix) of 343 pathway that are present in  
282 >20% of samples in at least one cohort. The Wilcoxon test was applied to assess  
283 microbial compositional difference between cohorts.

284

285 -Results: Lines 168-169. P values of  $<10^{-64}$  and  $10^{-260}$  do not make sense. Please either  
286 reevaluate the null hypothesis or explain how these p-values are generated.

287

288 **Reply:** We apologize for the confusion. These P-values are not for correlation. They are  
289 P-values for cohort enrichment estimated by Fisher's exact test. We have now added the  
290 pie charts in Fig. 3C&D to show the distribution of cohort-specific effects and have  
291 further clarified this in the text.

292 L139-146: *"Interestingly, cohort-specific co-abundances were significantly enriched in the*  
293 *disease cohorts compared to the population-based cohorts: 113 (94%) species co-*  
294 *abundances and 1,050 (72%) pathway co-abundances were specifically related to the IBD*  
295 *cohort (Fisher's test  $P=1.2 \times 10^{-56}$  and  $P < 10^{-260}$ , respectively, Fig 3C-D) and 281 (19.4%)*  
296 *pathway co-abundances were specifically related to the 3000B cohort (Fisher's test*  
297  *$P=2.9 \times 10^{-29}$ ), as compared to only 3 species and 117 pathway co-abundance relationships*  
298 *specific to the population-based cohorts LLD and 500FG (Fig 3C-D)."*

299

300 -Results: Line 170. There are 'xxx' and 'xx' words in the sentence. These need to be  
301 specified as these numbers are crucial to the results.

302

303 **Reply:** We apologize for this inadvertent mistake. Now we have fixed it.

304 L144-146: *"as compared to only 3 species and 117 pathway co-abundance relationships*  
305 *specific to the population-based cohorts LLD and 500FG (Fig 3C-D)."*

306

307 -Results: the use of HUMAnN2. What would happen if another pathway annotation  
308 scheme were used, i.e. mcSEED?

309

310 **Reply:** We thank the reviewer for this suggestion. We acknowledge that knowledge of  
311 microbial functionality is still limited. None of pathway annotation tools can give a  
312 comprehensive picture of the microbial functional profile, and our analysis may be  
313 biased due to annotation of HUMAnN2. Therefore, instead of re-doing all analysis using  
314 mcSEED, we decide to discuss the limitation of our study. We sincerely hope that this  
315 addresses the concerns of the reviewer.

316 L329: *"However, we also acknowledge several limitations of our study. This is an in-silico*  
317 *network analysis based on correlation in bacterial abundance levels. Even with the largest*  
318 *sample size to date, our study is still undersized for making comparisons to the number of*  
319 *interactions assessed. In recent years, many different network tools have been developed to*  
320 *tackle the statistical challenges in inferring networks for compositional data. In this study,*

321 *we applied two independent methods, SparCC and SpiecEasi, to establish microbial co-*  
322 *abundance networks based on MetaPhlan and HUMAnN2 annotation. Our analysis can*  
323 *thus be biased due to these annotation tools. Other annotation tools, e.g. mcSEED <sup>65</sup>, may*  
324 *yield different pictures of microbial community and functional profile, thereby identifying*  
325 *different co-abundance networks. Thus, such in-silico-based network inferences require*  
326 *further functional validation. Although bacterial genes are believed to be expressed*  
327 *uniformly <sup>66</sup>, previous studies have also shown that meta-transcription can exert dynamic*  
328 *changes in response to environmental perturbations that cannot be detected at the*  
329 *metagenome level <sup>67,68</sup>. Thus, in order to understand the microbial ecosystem in terms of*  
330 *functional interaction in diseases, we need complementary approaches like meta-*  
331 *proteomics and meta-metabolomics that provide a more direct readout of the functional*  
332 *properties of the gut microbiome. Furthermore, the cross-sectional design of this study*  
333 *makes it hard to assess the stability of our findings over time.”*

334

335 -Results: Lines 196-207. The functional link to physiology is specious. The co-abundant  
336 pathways are identified through statistical analysis of fecal samples; why should there  
337 be a correspondence between what is observed in the feces with core metabolism in the  
338 organism?

339

340 **Reply:** We thank the reviewer for pointing this out and have removed that sentence.  
341 Furthermore, we have revised the paragraph to avoid over-interpretation.

342 L249-261: *“When we compared microbial co-abundances in the 3000B to the other three*  
343 *cohorts, we identified 281 pathway co-abundances that showed a significantly different*  
344 *effect, i.e. obesity-specific co-abundances. One key pathway in obesity was degradation of*  
345 *allantoin (PWY0-41, Fig 4B, Table S6), which showed obesity-specific co-abundance*  
346 *relationships with 85 pathways. Allantoin is one of the active principles in various plants,*  
347 *e.g. yams, and is found to enhance insulin secretion and lower plasma glucose <sup>47,48</sup>. Its*  
348 *degradation product, oxamate, plays an inhibitory role in oxaloacetate/aspartate amino*  
349 *acids <sup>49</sup>. In line with this, we found that the allantoin degradation pathway showed*  
350 *stronger negative correlations with the biosynthesis pathways of oxaloacetate/aspartate*  
351 *amino acids (including lysine, homoserine, methionine, threonine and isoleucine) and the*  
352 *biosynthesis pathway of aspartate (PWY0-781, Fig 6), which were both positively*  
353 *associated with fasting glucose level and negatively associated with fasting insulin level*  
354 *( $P < 0.05$ , Table S15).”*

355

356 -Methods: Line 571-572. It would be worth analyzing the longitudinal data of the iHMP  
357 to see what the stability of the co-abundant network is over time and through  
358 fluctuations in disease and recovery. IBD is a particularly salient use-case for looking at  
359 dynamics of the microbiome as patients go through phases of disease that vary in  
360 severity; thus each person can serve as their own 'control' so to speak.

361

362 **Reply:** We thank the reviewer for this suggestion. We have now analyzed the  
363 longitudinal data of the iHMP-IBD and compared the IBD co-abundance networks  
364 between the first and the last sample collection from 77 iHMP-IBD participants (~one  
365 year apart). Here we observed 90.6% and 99.6% replication rates for species and  
366 pathway co-abundances, respectively. These results are now discussed in the main text,  
367 and detailed results have been added into Tables S1 & S3. For more details please see  
368 the answer above.

369 In addition, we have now performed systematic comparisons between IBD subtypes (UC  
370 vs. CD), locations (colon vs. ileum) and disease activities (inflammation vs. no  
371 inflammation) in our IBD cohort. Here we found that 16 species co-abundances were  
372 related to disease subtype and 8 species co-abundances were related to disease location,  
373 while 91, 24 and 3 pathway co-abundances were related to disease subtypes, location  
374 and activity, respectively. The results have been added to the main text.

375 L167-183: *“Microbial networks of IBD in relation to disease characteristics. Previous*  
376 *studies have shown that observed microbial abundance differences could be explained by*  
377 *certain disease characteristics of IBD*<sup>14</sup>*. We therefore hypothesized that this could also be*  
378 *the case for co-abundance relationships. We assessed whether IBD co-abundances*  
379 *(including IBD co-abundances at FDR<0.05 and IBD-specific co-abundances) could be*  
380 *related to the disease subtypes [ulcerative colitis (UC, n=189) vs. Crohn’s disease (CD,*  
381 *n=276)], disease location [ileum (n=212) vs. colon (n=286)] and disease activity*  
382 *[inflammation (n=121) vs. no inflammation (n=377)]. Most of the co-abundance*  
383 *relationships were comparable between disease characteristics, and only a few showed*  
384 *significant differences at FDR<0.05 (Fig S7, Tables S9-10), namely 16 species co-*  
385 *abundances related to disease subtypes and 8 species co-abundances related to location.*  
386 *For the pathway co-abundances, 91 were related to disease subtypes, 24 to location and 3*  
387 *to activity (Cochran-Q test FDR<0.05, Fig S7). Out of these, five co-abundance relationships*  
388 *were related to an important butyrate producer, Faecalibacterium prausnitzii, which*  
389 *showed stronger co-abundance relationships in UC compared to CD. One example here was*  
390 *the negative co-abundance relationship of F. prausnitzii with Haemophilus parainfluenzae,*  
391 *a species known to have pathogenic properties*<sup>40</sup>*.”*

392 Line 184- 192: “Microbial networks of IBD in relation to medication. We further tested  
 393 whether drug usage can affect microbial co-abundance, as usage of antibiotics (20.0%)  
 394 and proton pump inhibitors (PPIs, 26.5%) was higher in patients with IBD than in the  
 395 general population cohorts (1.1% and 8.4%). Here we detected no significant difference in  
 396 species co-abundances between antibiotic users and non-users (Cochran-Q test  $FDR > 0.05$ ,  
 397 Fig S7), while 1,049 out of 37,959 (3.7%) pathway co-abundance relationships showed  
 398 statistically significant differences between PPI users and non-users, in particular related  
 399 to the isoprene biosynthesis and methylerythritol phosphate pathways (Cochran-Q test  
 400  $FDR < 0.05$ , Fig S7, Table S10).”

401

402 The comparisons between disease sub-phenotypes and medication usages are also  
 403 shown in the Figure S7 (see below).

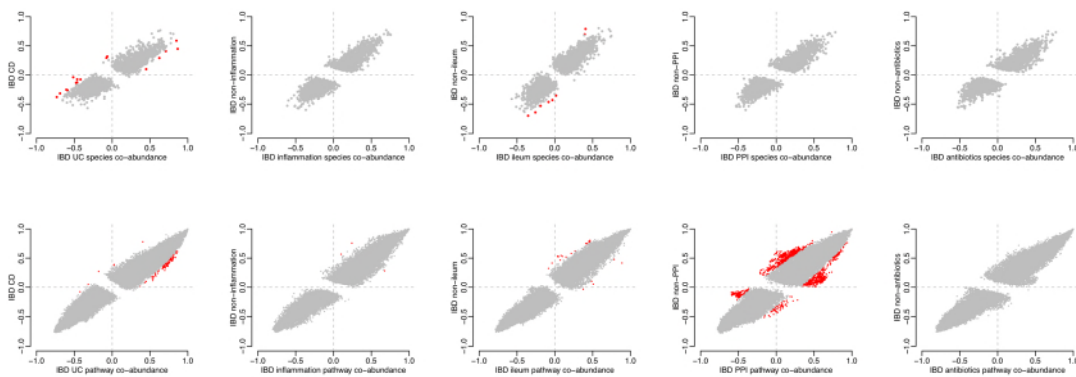

404

405 **Figure S7.** IBD co-abundances in relation to sub-phenotypes. We assessed whether  
 406 microbial co-abundances in IBD showed difference between IBD subtypes (UC vs. CD),  
 407 disease activities (inflammation vs. no inflammation) and locations (ileum vs. colon) and  
 408 with the usage of PPIs and antibiotics. Upper panel represents species co-abundances.  
 409 Lower panel represents pathway co-abundances. Each dot represents one co-  
 410 abundance. Red dots represent microbial co-abundances that show a difference in their  
 411 effect size between sub-phenotypes at  $FDR < 0.05$ .

412

413



414 **Reviewer 2:**

415 The manuscript by Chen et al., describes a large co-abundance network-based  
416 microbiota analysis in 4 different cohorts. Sample material was stool, which was  
417 handled identically between the cohorts and metagenomic sequences were obtained in a  
418 single centre. The co-abundance networks were reconstructed from species- and  
419 pathway-level information. The study claims that specific microbial co-abundance  
420 relationships are associated with the physiological (or pathological) state, however they  
421 also show a high degree of heterogeneity (64% at the pathway level). For the IBD  
422 cohort, effects were partially verified in an independent iHMP cohort. Cohort-specific  
423 edges were significantly enriched in the IBD and obesity cohorts and are described to be  
424 enriched in few hubs (obesity 1 pathway hub, IBD 5 species and 6 pathway hubs). The  
425 obesity hub is associated with allantoin degradation, the top pathway hubs for IBD was  
426 assigned to the reductive TCA cycle term.

427 The study is a large descriptive undertaking and makes use of existing metagenomic  
428 datasets from large cohorts. The employed algorithms and statistical approaches seem  
429 appropriate, however the manuscript lacks in my eyes the necessary clarity and scrutiny  
430 on physiological relevance of the findings. The manuscript is written in a very technical  
431 style, rarely the approaches are bio-medically “translated”. For a broader readership, I  
432 would strongly recommend re-writing the abstract, results (and discussion) section.

433

434 **Reply:** We appreciate the reviewer’s suggestion. We have substantially revised the  
435 manuscript, significantly reduced the technical description, and added more  
436 interpretation regarding the biomedical relevance. In particular, we now include two  
437 separate result sections on “**Microbial co-abundance network in IBD**” (Line 151-232)  
438 and “**Microbial co-abundance network in 3000B**” (Line 233-261). The Discussion has  
439 also been strengthened. We have also discussed on limitations of the current study. We  
440 also believe that the readability has been improved to reach a wider audience.

441

442 The network lingo is not very instructive, I would also suggest to move the analytical  
443 scheme in abbreviated form into the main figures, so that one can follow the flow of  
444 analyses.

445

446 **Reply:** We thank the reviewer for this valuable suggestion, we have now switched the  
447 analysis work flow (Figure S1) to main Figure 1.

448

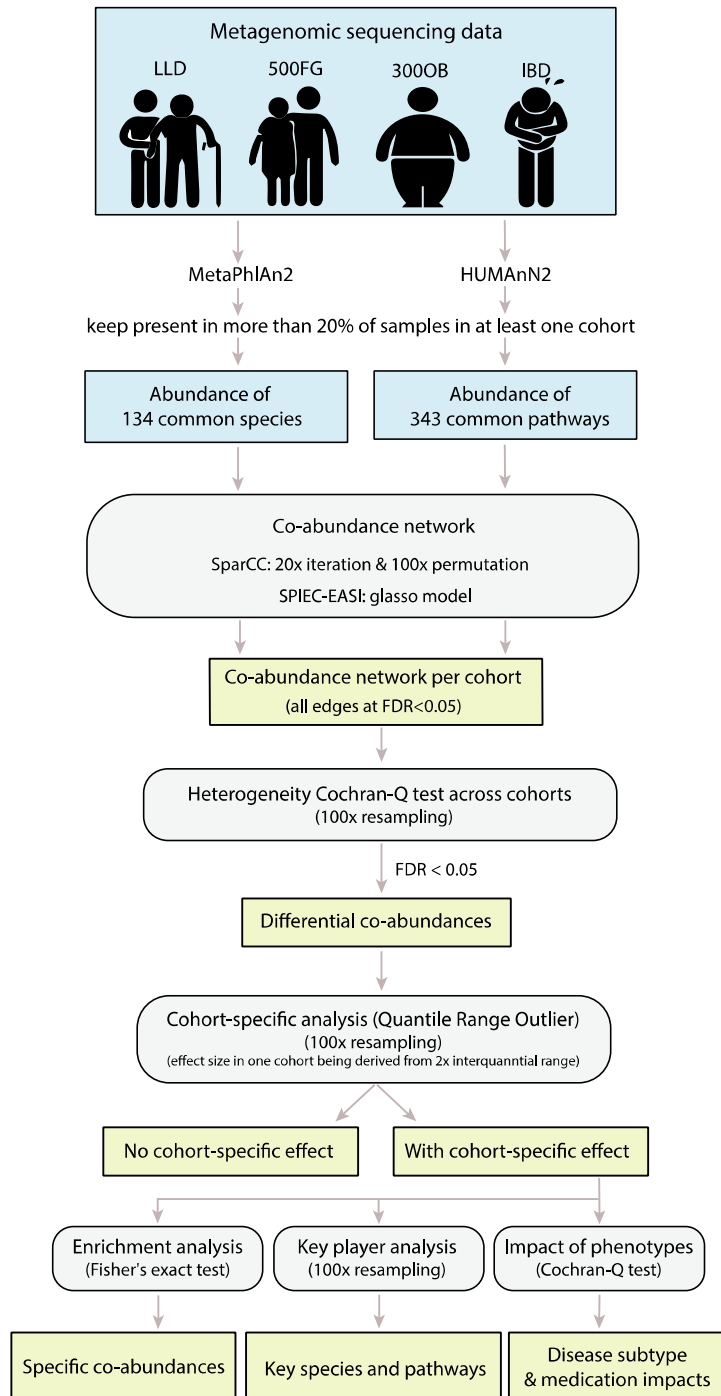

449

450 The entire study is based on features that are present in >20% in at least one of the  
 451 cohorts. How did the authors define this number, what would happen if the cutoff is set  
 452 to 5, 10 or 30%?

453

454 **Reply:** The reviewer questioned the choice of 20% as a filter cutoff for species and  
 455 pathways. Please note that there is no conventional threshold set in the field. Many  
 456 microbial association studies, including many of our previous studies and the recent  
 457 iHMP study (Lloyd-Price et al., Nature, 2019), chose to use 10% presence and/or at least

458 0.01% abundance level as their filter. However, these studies often link very sparse  
 459 microbial data to rather complete metadata. In the current microbial network analysis,  
 460 we have to link very sparse microbial data to itself. Moreover, the aim of our study was  
 461 to not only construct microbial networks but also to compare networks between  
 462 cohorts. The sample sizes of our four cohorts varied greatly, ranging from 1,135 in LLD  
 463 to 298 in the obesity cohort. It is therefore important to ensure there are enough non-  
 464 zero samples per cohort for reliable co-occurrence and co-abundance detection. We thus  
 465 increased the cutoff to 20% to ensure sufficient data points for pair-wise correlation. At  
 466 our cutoff, we identified 134 species and 343 pathways present in all the four cohorts  
 467 with a minimal average abundance of 0.07%. Moreover, these species and pathways  
 468 sufficiently captured the microbial composition, collectively accounting for, on average,  
 469 86.9% of bacterial species and 99.9% of functional composition (please see also the  
 470 compositionality analysis below). Furthermore, 91% of the common species (123 out of  
 471 134) and 99% of the common pathways (340 out of 343) were also detected in the IBD  
 472 cohort (n=77) from the iHMP-IBD project, which supports the robustness of the 20%  
 473 cutoff.

474 Following the reviewer’s suggestion, we also checked microbial networks by applying a  
 475 5%, 10% and 30% cutoff (see rebuttal Table 2 below). By applying different cutoffs, we  
 476 observed that pathway co-abundance networks are comparable between different  
 477 cutoffs, as they are less sparse than species data. We detected the most variable co-  
 478 abundances for species at 20% cutoff. Thus, we have decided to continue using the 20%  
 479 cutoff in our study.

480

481 Rebuttal Table 2: Number of co-abundances by different filtering cutoff.

|                                              | 5%    | 10%   | 20%   | 30%   |
|----------------------------------------------|-------|-------|-------|-------|
| No. of species                               | 226   | 174   | 134   | 101   |
| Percentage of variable species co-abundances | 16.0% | 20.1% | 38.6% | 21.6% |
| No. of pathways                              | 378   | 365   | 343   | 332   |
| Percentage of variable pathway co-abundances | 69.0% | 65.1% | 64.3% | 70.2% |

482

483 Although the network analyses and figures are highly sophisticated, the clinical  
 484 variables are only treated very superficially. There are networks specific to the “obesity”  
 485 cohort, but clinically the BMI range is huge. Maybe I misunderstood, but have the  
 486 authors tried to quantitatively model the co-abundance network with the BMI? If  
 487 something is appearing in a cohort which samples high BMI individuals, shouldn’t the

488 same network properties also occur, if high BMI individuals are subsampled from the  
489 other cohorts?

490

491 **Reply:** We thank the reviewer for this valuable suggestion. To replicate microbial  
492 networks in 3000B, we selected 134 obese individuals from the LLD cohort with  
493 matched age and BMI. For the replication rate, we considered a co-abundance to be  
494 replicable if the estimated correlation coefficient was comparable between 3000B and  
495 the replication cohort (Cochran-Q test heterogeneity test  $P > 0.05$ ). For 1,107 species and  
496 37,886 pathway co-abundances detected in the 3000B cohort, 991 (89.5%) species co-  
497 abundance and 32,963 (87.0%) pathway co-abundance show no difference in the  
498 replication cohort, suggesting our findings are largely replicable. We have now added  
499 this to the result section.

500 Line238: *“Replication of 3000B network in LLD obese individuals. 1,107 species and*  
501 *37,886 pathway co-abundances were detected in the 3000B cohort (Fig 2). These*  
502 *estimated co-abundance strengths were largely replicable in 134 obese individuals with*  
503 *matched age and BMI from the LLD cohort, with 991 (89.5%) species co-abundances and*  
504 *32,963 (87.0%) pathway co-abundances showing no difference (Cochran-Q test  $P > 0.05$ , Fig*  
505 *S8, Tables S13-14).”*

506

507 Moreover, the comparison has also been shown in the supplementary figure 8

508

509

510

511 **Figure S8.** Replication of obesity network in 134  
512 obesity individuals from the LLD cohort. The  
513 comparisons of co-abundance strengths in terms of  
514 correlation coefficients in the 3000B cohort and in 134  
515 obesity individuals from the LLD cohort with similar  
516 ages and BMIs. X-axis represents the estimated  
517 correlation coefficients in the 3000B cohort. Y-axis  
518 represents the estimated correlation coefficients in  
519 obese individuals from the LLD cohort. Upper panel  
520 represents species co-abundances. Lower panel  
521 represents pathway co-abundances. Each dot  
522 represents one co-abundance. Red dots represent  
523 microbial co-abundances that show a difference in  
524 their effect size between first and last time points at  
525  $P < 0.05$ .

526

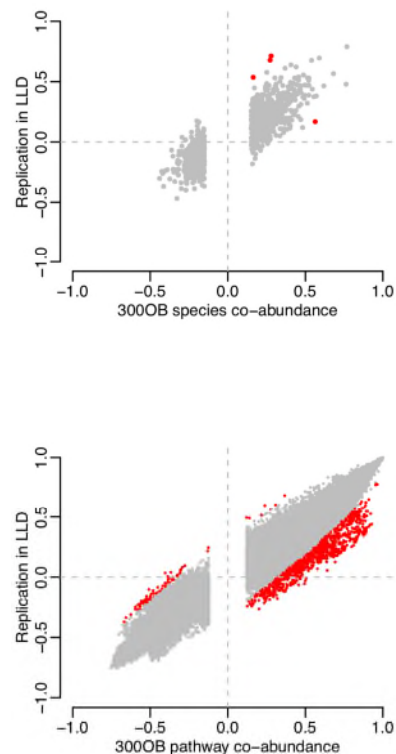

527 In addition, we further assessed the relevance of microbial networks in the obesity  
528 cohort to obesity-related diseases, namely atherosclerosis and type-2-diabetes.

529 Line 240-248: "Microbial networks in relation to obesity-related diseases. The 3000B  
530 cohort was set up to study cardiovascular disease in obese individuals, including 139  
531 patients with atherosclerotic plaque and 159 obese controls. In addition, 35 3000B  
532 participants had diabetes. Here we observed only three species co-abundances related to  
533 cardiovascular disease, with all three showing stronger co-abundances in patients with  
534 plaque than in patients without (Cochran-Q test  $FDR < 0.05$ , Fig S9, Tables S13-14). These  
535 were positive co-abundances between *Dorea longicatena* and *Dorea formicigenerans* and  
536 negative co-abundances of *Lachnospiraceae* bacterium 9.1.43BFAA with *Coprococcus*  
537 *comes* and *Dorea longicatena*."

538

539 These comparisons are also presented in the Figure S9 (see below).

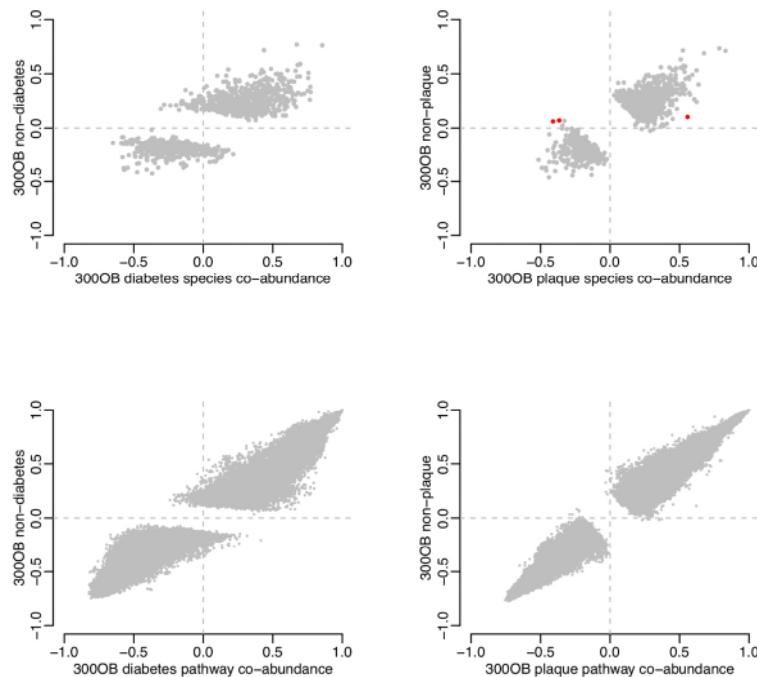

540

541 **Figure S9.** Obesity co-abundances in relation to phenotypes. We further assessed  
542 whether microbial co-abundances in 3000B showed difference between patients with  
543 and without diabetes and atherosclerotic plaque. Upper panel represents species co-  
544 abundances. Lower panel represents pathway co-abundances. Each dot represents one  
545 co-abundance. Both the X- and Y-axes represent correlation coefficient of co-  
546 abundances. Red dots represent microbial co-abundances that show a difference in their  
547 effect size between subtypes at  $FDR < 0.05$ .

548

549 Also, the clinical attribute IBD is inappropriate if only used alone. The authors clearly  
550 must try to discriminate between CD/UC and to correlate their findings to clinical

551 activity and co-medication. The stability assessment (p8, line 170ff.) refers to this to  
552 some degree, but is really unclear and vague.

553

554 **Reply:** We apologize for the unclear description. We have now systematically assessed  
555 the microbial networks of IBD in relation to disease subtypes (CD vs UC), location (colon  
556 vs ileum) and activities (inflammation vs no inflammation). We also assessed their  
557 relevance to medication use, especially of antibiotics and proton pump inhibitors. We  
558 have now added a more detailed description into the two separate result sections.

559 L167-183: *“Microbial networks of IBD in relation to disease characteristics. Previous*  
560 *studies have shown that observed microbial abundance differences could be explained by*  
561 *certain disease characteristics of IBD*<sup>14</sup>. *We therefore hypothesized that this could also be*  
562 *the case for co-abundance relationships. We assessed whether IBD co-abundances*  
563 *(including IBD co-abundances at FDR<0.05 and IBD-specific co-abundances) could be*  
564 *related to the disease subtypes [ulcerative colitis (UC, n=189) vs. Crohn’s disease (CD,*  
565 *n=276)], disease location [ileum (n=212) vs. colon (n=286)] and disease activity*  
566 *[inflammation (n=121) vs. no inflammation (n=377)]. Most of the co-abundance*  
567 *relationships were comparable between disease characteristics, and only a few showed*  
568 *significant differences at FDR<0.05 (Fig S7, Tables S9-10), namely 16 species co-*  
569 *abundances related to disease subtypes and 8 species co-abundances related to location.*  
570 *For the pathway co-abundances, 91 were related to disease subtypes, 24 to location and 3*  
571 *to activity (Cochran-Q test FDR<0.05, Fig S7). Out of these, five co-abundance relationships*  
572 *were related to an important butyrate producer, Faecalibacterium prausnitzii, which*  
573 *showed stronger co-abundance relationships in UC compared to CD. One example here was*  
574 *the negative co-abundance relationship of F. prausnitzii with Haemophilus parainfluenzae,*  
575 *a species known to have pathogenic properties*<sup>40</sup>.”

576 Line 184- 192: *“Microbial networks of IBD in relation to medication. We further tested*  
577 *whether drug usage can affect microbial co-abundance, as usage of antibiotics (20.0%)*  
578 *and proton pump inhibitors (PPIs, 26.5%) was higher in patients with IBD than in the*  
579 *general population cohorts (1.1% and 8.4%). Here we detected no significant difference in*  
580 *species co-abundances between antibiotic users and non-users (Cochran-Q test FDR>0.05,*  
581 *Fig S7), while 1,049 out of 37,959 (3.7%) pathway co-abundance relationships showed*  
582 *statistically significant differences between PPI users and non-users, in particular related*  
583 *to the isoprene biosynthesis and methylerythritol phosphate pathways (Cochran-Q test*  
584 *FDR<0.05, Fig S7, Table S10).”*

585

586

587 These comparisons are also presented in the supplementary figure 7 (see below).

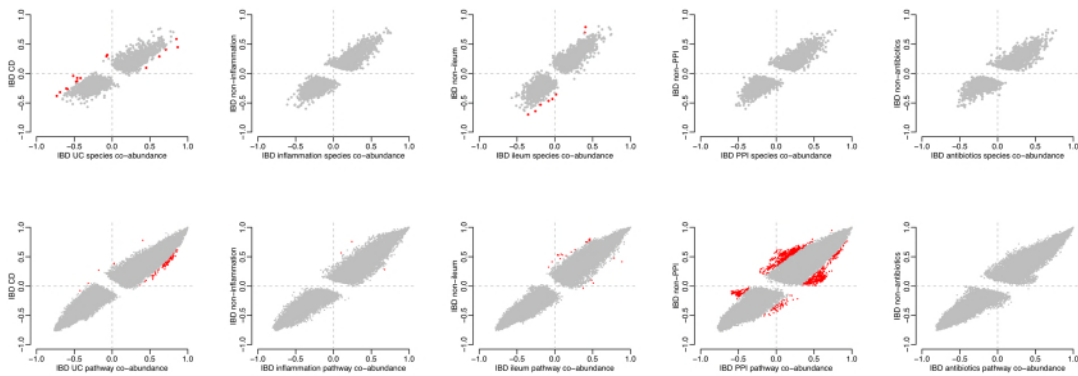

588

589 **Figure S7.** IBD co-abundances in relation to sub-phenotypes. We assessed whether  
590 microbial co-abundances in IBD showed differences between IBD subtypes (UC vs. CD),  
591 disease activities (inflammation vs. no inflammation) and locations (ileum vs. not-ileum  
592 (colon)) and with the usage of PPI and antibiotics. Upper panel represents species co-  
593 abundances. Lower panel represents pathway co-abundances. Each dot represents one  
594 co-abundance. Red dots represent microbial co-abundances that show a difference in  
595 their effect size between sub-phenotypes at  $FDR < 0.05$ .

596

597 Some strange technical typos: p8, line 170 “xxx species and xx pathway edges” ?

598

599 **Reply:** We apologize for this inadvertent mistake. Now we have fixed it.

600 L144-146: “as compared to only 3 species and 117 pathway co-abundance relationships  
601 specific to the population-based cohorts LLD and 500FG (Fig 3C-D).”

602

603 the references have strange page numbers (partially)

604

605 **Reply:** The references have been thoroughly checked and we have now fixed the page  
606 numbers.

REVIEWERS' COMMENTS:

Reviewer #1 (Remarks to the Author):

All of my comments have been satisfactorily answered.

Reviewer #2 (Remarks to the Author):

The authors have responded to most of my points , I find the paper much improved.

Minor:

1. In the IBD cohort , I would demand a formal cohort description in form of a table ( main stratum: UC /CD , substrata: inflammatory activity, medication including IBD-specific medication, age distribution, disease location) Currently, the way it is described it its confusing for a clinical reader, as all categories are independent, i.e. subtype or inflammatory activity or medication.
2. Antibiotics / PPI are important , but I would request a formal correlation analysis of networks to IBD specific medication ( i.e. naive vs cortisone usage , naive vs. immunosuppressants and naive vs. biologicals) as several papers have pinpointed microbiome states and response to therapies ( e.g. vedo or IFX).



## Reviewer 2:

### Minor:

1. In the IBD cohort, I would demand a formal cohort description in form of a table ( main stratum: UC /CD , substrata: inflammatory activity, medication including IBD-specific medication, age distribution, disease location) Currently, the way it is described it its confusing for a clinical reader, as all categories are independent, i.e. subtype or inflammatory activity or medication.

**Reply:** We thank the reviewer for this suggestion. We have now added a supplementary table to summarize the clinical characterization of the IBD and the 300OB cohorts.

**Supplementary Table 1: Summary of sub-phenotypes in the IBD and obesity.**

| Phenotypes                             | IBD (n = 496) |                        |               |
|----------------------------------------|---------------|------------------------|---------------|
|                                        | CD (n = 276)  | UC (n = 189)           | IBDU (n = 31) |
| Age mean (range)                       | 41.2 (18- 81) | 46.6 (19- 82)          | 44.2 (19- 76) |
| <b>Disease location</b>                |               |                        |               |
| Colon n (%)                            | 59 (22)       | 189 (100)              | 31 (100)      |
| Ileum n (%)                            | 92 (35)       | 0 (0)                  | 0 (0)         |
| Both n (%)                             | 112 (43)      | 0 (0)                  | 0 (0)         |
| <b>Active disease n (%)</b>            | 69 (25)       | 46 (25)                | 6 (24)        |
| <b>Antibiotics yes (%)</b>             | 58 (21)       | 32 (17)                | 5 (16)        |
| <b>IBD-medication</b>                  |               |                        |               |
| Mesalazines yes(%)                     | 25 (9)        | 123 (65)               | 23 (74)       |
| Steroids yes (%)                       | 46 (17)       | 31 (16)                | 4 (13)        |
| Immunosuppressants yes (%)             | 129 (47)      | 65 (34)                | 7 (23)        |
| Anti-TNFalpha yes (%)                  | 101 (37)      | 19 (10)                | 3 (10)        |
| Thiopurines yes (%)                    | 97 (35)       | 52 (28)                | 4 (13)        |
| Other biologicals yes (%)              | 3 (1)         | 0 (0)                  | 0 (0)         |
| <b>Other medications</b>               |               |                        |               |
| ACE-inhibitor yes (%)                  | 10 (4)        | 10 (5)                 | 4 (13)        |
| angII-receptor antagonist yes (%)      | 4 (1)         | 5 (3)                  | 1 (3)         |
| Beta-blockers yes (%)                  | 15 (5)        | 10 (5)                 | 6 (19)        |
| Bisphosphonates yes (%)                | 6 (2)         | 5 (3)                  | 0 (0)         |
| Iron supplementation yes (%)           | 7 (3)         | 6 (3)                  | 0 (0)         |
| Folic acid yes (%)                     | 26 (9)        | 1 (1)                  | 2 (6)         |
| Laxatives yes (%)                      | 20 (7)        | 6 (3)                  | 3 (10)        |
| Metformin yes (%)                      | 2 (1)         | 4 (2)                  | 1 (3)         |
| NSAID yes (%)                          | 13 (5)        | 4 (2)                  | 4 (13)        |
| Opiat yes (%)                          | 19 (7)        | 1 (1)                  | 1 (3)         |
| Platelet aggregation inhibitor yes (%) | 12 (4)        | 11 (6)                 | 3 (10)        |
| PPI yes (%)                            | 66 (24)       | 28 (15)                | 7 (23)        |
| SSRI-antidepressant yes (%)            | 5 (2)         | 2 (1)                  | 2 (6)         |
| Statin yes (%)                         | 9 (3)         | 14 (7)                 | 3 (10)        |
| Thiazide diuretic yes (%)              | 6 (2)         | 9 (5)                  | 1 (3)         |
|                                        |               | <b>300OB (n = 298)</b> |               |
| Age mean (range)                       |               | 67.1 (54- 80)          |               |
| Diabetes yes (%)                       |               | 35 (12)                |               |
| Atherosclerotic plaque yes (%)         |               | 139 (47)               |               |

2. Antibiotics / PPI are important, but I would request a formal correlation analysis of networks to IBD specific medication (i.e. naive vs cortisone usage, naive vs. immunosuppressants and naive vs. biologicals) as several papers have pinpointed microbiome states and response to therapies (e.g. vedo or IFX).

**Reply:** We thank the reviewer for the suggestion. Unfortunately, we are not able to perform the requested analyses for three reasons. Firstly, we lack treatment-naïve patients as controls because the IBD cohort in the present study does not contain any treatment-naïve patients. All IBD patients are enrolled at the University Medical Center Groningen, which is a tertiary hospital. Patients entering this tertiary hospital are already under IBD treatment at the first line or in a secondary hospital. Secondly, we cannot disentangle whether the observed effects are specific to the drug or the IBD subtype. Some commonly used IBD medications are subtype-specific, mesalazines, for example, are mostly used for the treatment of ulcerative colitis (see also Supplementary Table 1). Thirdly, we do not have enough power to do these analyses in some drugs, such as biologicals. The number of drug users is also very small (see Supplementary Table 1).
